# Supplementary material for: Graphene mechanics: I. Efficient first principles based Morse potential
Source: Royal Society of Chemistry journal article supplement (doi:10.1039/c3cp55340j), 2014-01-01
Supplement: c3cp55340j1.pdf [file c3cp55340j1.pdf]

# Graphene mechanics: I. Efficient first principles based Morse potential

## Supplementary Material

Bogdan I. Costescu,<sup>a</sup> Ilona B. Baldus,<sup>a</sup> and Frauke Gräter<sup>ab\*</sup>

<sup>a</sup> Heidelberg Institute for Theoretical Studies, Schloss-Wolfsbrunnenweg 35, 69118 Heidelberg, Germany

<sup>b</sup> CAS-MPG Partner Institute and Key Laboratory for Computational Biology, Shanghai Institutes for Biological Sciences, Chinese Academy of Sciences, 320 Yueyang Road, Shanghai 200031, China

\*E-mail: frauke.graeter@h-its.org

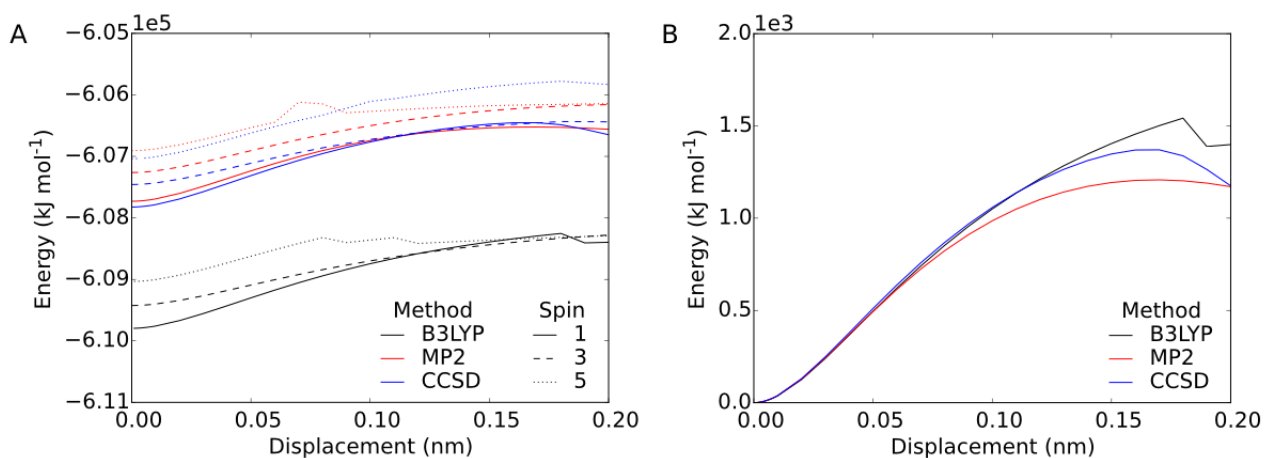

**Fig. S1** Energy profiles of benzene dissociation as a function of distance between the fragments, calculated with several QM methods. The dissociation generates 2 mirror fragments, each with 3 C and 3 H atoms, and breaks two C-C bonds. Energy profiles are shown up to a distance of 0.2 nm, which is larger than the distance (0.12 nm) used in the fitting procedure (Fig. 4 of main article). We conclude that using B3LYP and the lowest spin multiplicity is appropriate for aromatic bond breaking. A) Absolute energy profiles show that the the singlet state is the most energetically favorable, independent of the method. B) The slope of the normalized energy profiles up to the inflection point is highly similar for the singlet state, independent of the method.
